# Supplementary material
Source: PubMed Central journal article supplement (PMC5666062)
Supplement: ajtr0009-4534-f5.pdf [file ajtr0009-4534-f5.pdf]

## Wnt signaling promote embryonic stem cells cultivation and somatic reprogramming

**Table S1.** Real-time PCR primers

| Primers           | Forward sequence          | Reverse sequence          |
|-------------------|---------------------------|---------------------------|
| <i>pou5f1</i>     | AGGAAGCCGACAACAATG        | CGGGCACTTCAGAAACAT        |
| <i>sox2</i>       | GCGGAGTGAAACTTTTGTCCCGG   | GAAGCGTACTTATCCTTGCCATC   |
| <i>nanog</i>      | TCTTCCTGGTCCCCACAGTTT     | GCAAGAATAGTTCTCGGGATGAACC |
| <i>akp</i>        | CAACCTGACTGACCCTTCGATCCTG | ATCCTGCCTCCTCCACC         |
| <i>e-cadherin</i> | CAGGTCTCCTCATGGCTTTGCCCTC | CGAAAAGAAGGCTGTCCCTACTTAT |
| <i>utf1</i>       | TGTCCCGGTGACTACGTCT       | CCCAGAAGTAGCTCCGTCTCT     |
| <i>zfp42</i>      | GAACCCACTGAGACTGGAGG      | TTCACCTTATAGCCAGGGTCAT    |
| <i>dppa3</i>      | GACCCAATGAAGGACCCTGAA     | GCTTGACACCGGGTTTAG        |
| <i>tcf1</i>       | ATCTGCTCATGCCCTACC        | GGTGTGACTGCTGAAATGTT      |
| <i>tcf3</i>       | AGCTCGGACTCCGAGGCGGAGA    | GGTACCCAGGATACGCAGGTCC    |
| <i>tcf4</i>       | CACCCGGCCATCGTCACAC       | GCCACCTGCGCCCGAGAAT       |
| <i>lef1</i>       | TGAGTGCACGCTAAAGGAGA      | ATAATTGTCTCGCGCTGACC      |
| $\beta$ -catenin  | ATGGACGTGGGCGAACTTTTA     | CGCCATCCCTGTCAATAATCTG    |
| <i>parp1</i>      | GTGACTTTTTAGCGGAGTACGC    | CCAGCGGTCAATCATAACCAGGAAC |
| <i>kdm2b</i>      | GATGCTGAGCGGTATCATCCG     | GAGACAGCGATCCATGAGCAGACA  |
| <i>tet1</i>       | CAGTGGTGCTAATGCAG         | AGCATGAACGGGAGAATCGG      |
| <i>suv39h1</i>    | CTGTGCCGACTAGCCAAGC       | ATACCCAGGCCACTTAACCAG     |
| <i>pecam1</i>     | CAAGCGAAGGATAGATAAGA      | CAGCGAAACTAACAACG         |
| <i>epcam</i>      | GCTGGCAACAAGTTGCTCTCTGAA  | CGTTGCACTGCTTGGCTTTGAAGA  |
| <i>crb3</i>       | CACCGGACCCTTTCACAAATA     | CCCCTGCTATAAGGAGGACT      |
| <i>ocln</i>       | CCTCCAATGGCAAAGTGAATGGCA  | TGTTTCATAGTGGTCAGGGTCCGT  |
| <i>cldn3</i>      | ACCAACTGCGTACAAGACGAG     | CAGAGCCGCCAACAGGAAA       |
| <i>cldn4</i>      | GTCCTGGGAATCTCCTTGCC      | TCTGTGCCGTGACGATGTTG      |
| <i>cldn7</i>      | GGCCTGATAGCGAGCACTG       | GTGACGCACTCCATCCAGA       |
| <i>thy1</i>       | TGCTCTCAGTCTTGCAAGGTG     | TGGATGGAGTTATCCTTGGTGTT   |
| <i>n-cadherin</i> | AGCGCAGTCTTACCGAAGG       | TCGCTGCTTTCATACTGAACCTT   |
| <i>zeb1</i>       | TGCTCACCTGCCCCGATTGTGATA  | AGTGCACCTGAACTTGCGGTTTCC  |
| <i>zeb2</i>       | TGATAGCCTTGCAAACCCTCGGA   | ATTGTGGTCTGGATCGTGGCTTCT  |
| <i>snai1</i>      | TTGTGTCTGCACGACCTGTGGAAA  | TCTTCACATCCGAGTGGGTTTGA   |
| <i>snai2</i>      | CACATTCGAACCCACACATTGCCT  | TGTGCCCTCAGGTTTGATCTGTCT  |
| <i>gapdh</i>      | TGTGTCCGTCGTGGATCTGA      | TTGCTGTTGAAGTCGCAGGAG     |

**Table S2.** Semi-Quantitivy RCR primers

| Primers                 | Forward sequence             | Reverse sequence                |
|-------------------------|------------------------------|---------------------------------|
| <i>Endogenous-oct4</i>  | TCTTTCCACCAGGCCCCCGGCTC      | TGCGGGCGGACATGGGGAGATCC         |
| <i>Total-oct4</i>       | CTGAGGGCCAGGCAGGAGCACGAG     | CTGTAGGGAGGGCTTCGGGCACTT        |
| <i>Endogenous-sox2</i>  | TTGCCTTAAACAAGACCACGA        | TAGAGCTAGACTCCGGGCGATGA         |
| <i>Total-sox2</i>       | GGTTACCTCTTCTCCCACTCCAGC     | TCACATGTGCGACAGGGGCGAG          |
| <i>Endogenous-klf4</i>  | GCGAACTCACACAGGCGAGAAACC     | TCGCTTCTCTTCTCCGACACA           |
| <i>Total-klf4</i>       | CACCATGGACCCGGGCGTGGCTGCC    | TTAGGCTGTTCTTTCCGGGGCCAC        |
| <i>Endogenous-c-myc</i> | TGACCTAACTCGAGGAGGAGCTGGAATC | AAGTTTGAGGCAGTAAAATTATGGCTGAAGC |
| <i>Total-c-myc</i>      | CAGAGGAGGAACGAGCTGAAGCGC     | TTATGCACCAGAGTTTCGAAGCTGTTCCG   |
| <i>Gata4</i>            | AACCAGAAAACGGAAGCCCAAG       | TACGCGGTGATTATGTCCCAT           |
| <i>Mixl1</i>            | TGTACCAGACATCCACTTGCG        | CCAGGAGTCCAACCTTTGAGCCA         |
| <i>Sox17</i>            | GGACCCGGCTTCTTTGCA           | ACACTGCTTCTGGCCCTCA             |
| <i>Foxa2</i>            | AGCCGTGAAGATGGAAGGG          | CGAGATGTACGAGTAGGGAGGT          |

## Wnt signaling promote embryonic stem cells cultivation and somatic reprogramming

|                     |                        |                       |
|---------------------|------------------------|-----------------------|
| <i>T</i>            | CCCGGTGCTGAAGGTAATGTG  | ATGAACTGGTCTCGGAAAGC  |
| <i>Flt1</i>         | TACGAAAAGTCCGTGTCCTCGC | TTTCAGGTCTCTCCTTCGGCT |
| <i>Nestin</i>       | GGCATCCCTGAATTACCCAA   | AGCTCATGGGCATCTGTCAA  |
| <i>Nefl</i>         | GGCATCCCTGAATTACCCAA   | AGCTCATGGGCATCTGTCAA  |
| <i>Sox1</i>         | ATGTCAACGGCTGGGCTAA    | TAGTGCTGTGGCAGCGAGT   |
| <i>βIII-tubulin</i> | ACCTCCCTTCGATTCCCTG    | CCATCTCATCCATGCCCTC   |
| <i>Gapdh</i>        | GCAGTGGCAAAGTGGAGATT   | GTCTTCTGGGTGGCAGTGT   |

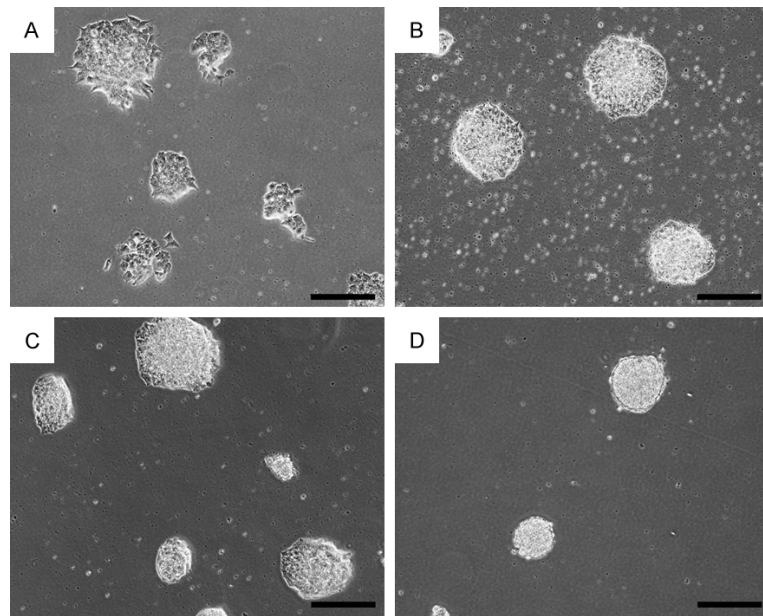

**Figure S1.** Morphology of ES cells in Wnt3a-CM during feeder-free culture. A. ES cells were exposed in ESCs-M; B. ES cells were exposed in 10% Wnt3a-CM; C. ES cells were exposed in 30% Wnt3a-CM; D. ES cells were exposed in 50% Wnt3a-CM. Bar=100  $\mu$ m.

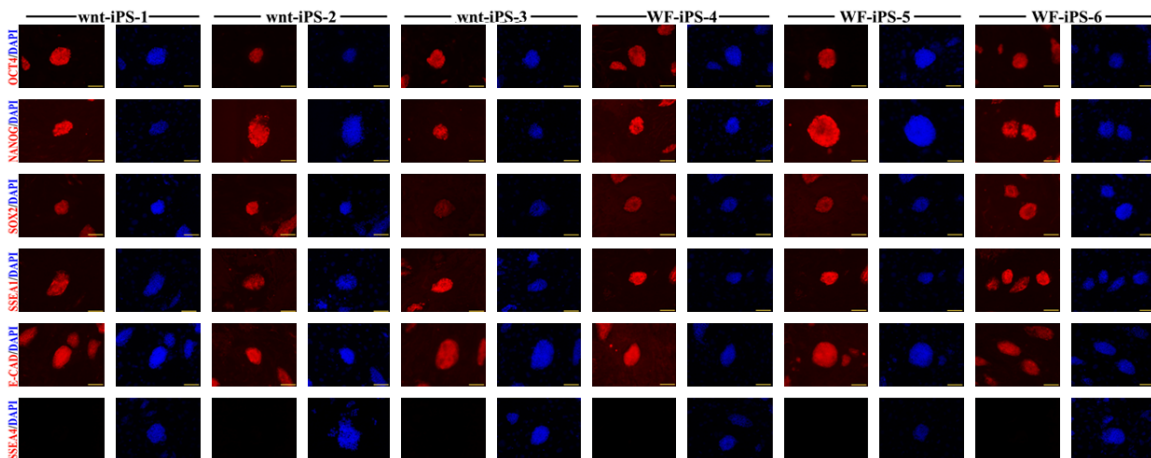

**Figure S2.** Pluripotent analysis of iPS cells that derived from L-Wnt3a feeder layer. Immunostaining of Oct4, Nanog, Sox2, SSEA1, SSEA4 and E-cadherin in iPS cells, bar=100  $\mu$ m.
